# Supplementary material
Source: PubMed Central journal article supplement (PMC8476685)
Supplement: 40614_2021_299_MOESM1_ESM.pdf [file 40614_2021_299_MOESM1_ESM.pdf]

Supplemental Materials for:  
**Applying Mixed-Effects Modeling to Behavioral Economic Demand: An  
Introduction**

Submitted to Perspectives on Behavior Science

Brent A. Kaplan, PhD<sup>a</sup>, Christopher T. Franck, PhD<sup>b</sup>, Kevin McKee, PhD<sup>b</sup>, Shawn P. Gilroy<sup>c</sup>, &  
Mikhail N. Koffarnus, PhD<sup>a</sup>, , & Warren K. Bickel, PhD<sup>c,d,e,f,g,h</sup>

<sup>a</sup> Department of Family and Community Medicine, Lexington, KY, USA

<sup>b</sup> Department of Statistics, Virginia Tech, Blacksburg, VA, USA

<sup>c</sup> Department of Psychology, Louisiana State University, Baton Rouge, LA, USA

**Corresponding Author:** Dr. Brent A. Kaplan

**Email:** [brentkaplan@uky.edu](mailto:brentkaplan@uky.edu)

**Contact information:**

Department of Family and Community Medicine

2195 Harrodsburg Rd., Ste 125

Lexington, KY 40504

Tel: 859-562-2714

Supplemental Materials

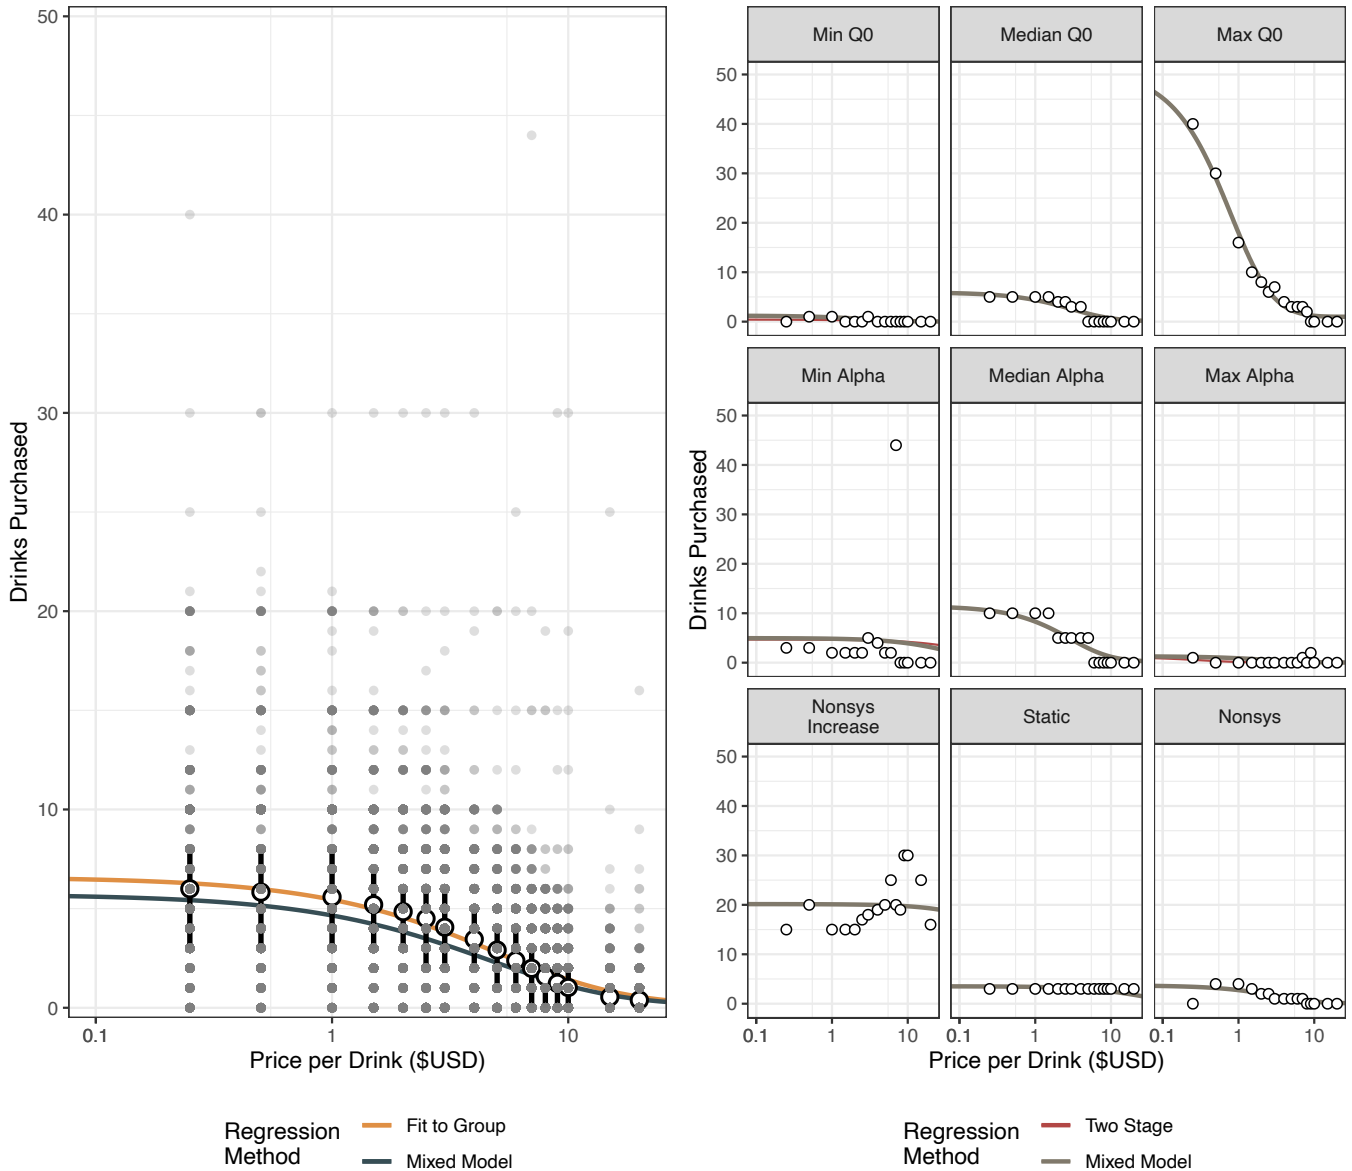

**Figure S1.** Graphical comparisons between the three different approaches to analyzing demand curve data. Original data from Kaplan and Reed (2018). *Left panel:* Individual points in gray circles and mean consumption at each price in open circles. The orange line represents the best-fit line using the fit-to-group approach whereas the blue line represents the best-fit line obtained from the fixed effects estimated using the mixed-effects modeling approach. Notice how the population-level fixed effects provides a best-fit line slightly lower than the fit-to-group approach. The mixed-effects model is able to provide random effect predictions for some datasets with low and flat line consumption values (e.g., “static” dataset bottom row of right panel), which influences the population level fixed effects, while also shrinking predictions from datasets with high consumption values. *Right panel:* A subset of participants and their responses. The maroon lines show the best fit lines from the two-stage approach for each participant. The gray lines show the predicted lines from the random effects obtained from the mixed-effects model approach. Overall, the lines show close correspondence with the bottom row yielding predicted lines from only the mixed-effects model approach.

MIXED-MODEL DEMAND

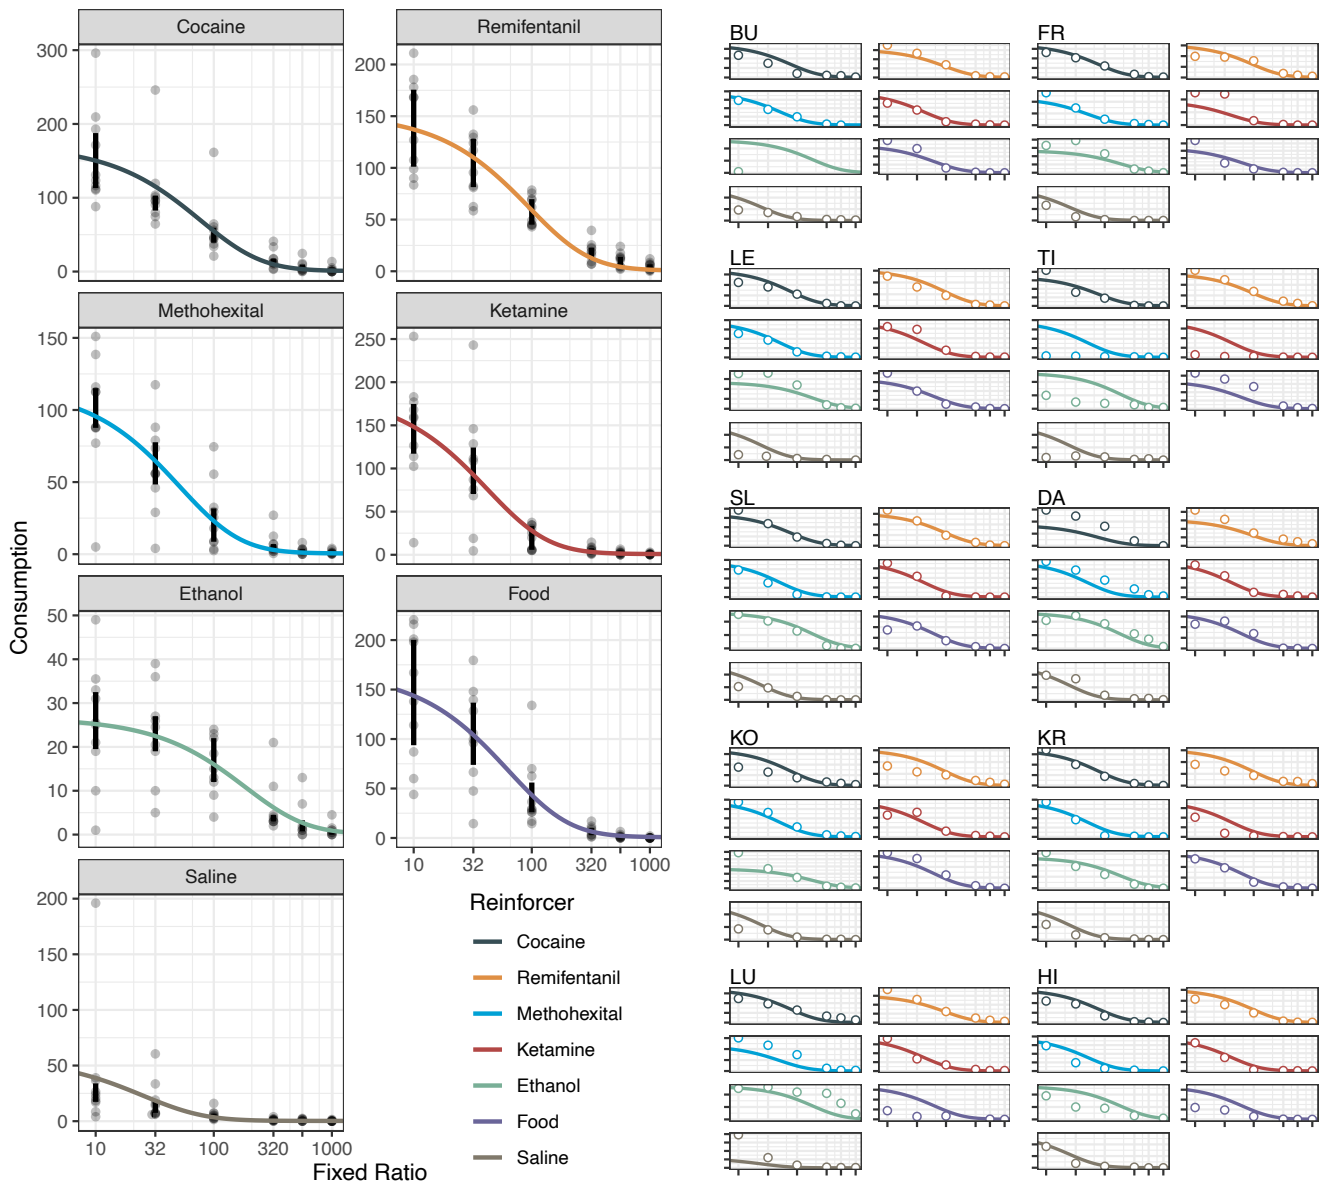

**Figure S2:** Results from the monkey fit-to-group approach. Original data from Koffarnus et al. (2012). *Left panel:* Individual points in gray. Black vertical bars indicate the interquartile range between 25% and 75%. The colored lines show the predictions from the fit-to-group approach for each reinforcer. *Right panel:* Nonhuman points and the observed consumption. The colored lines are identical across monkeys and within reinforcer, but vary across reinforcers, as is represented in the left panel.

# MIXED-MODEL DEMAND

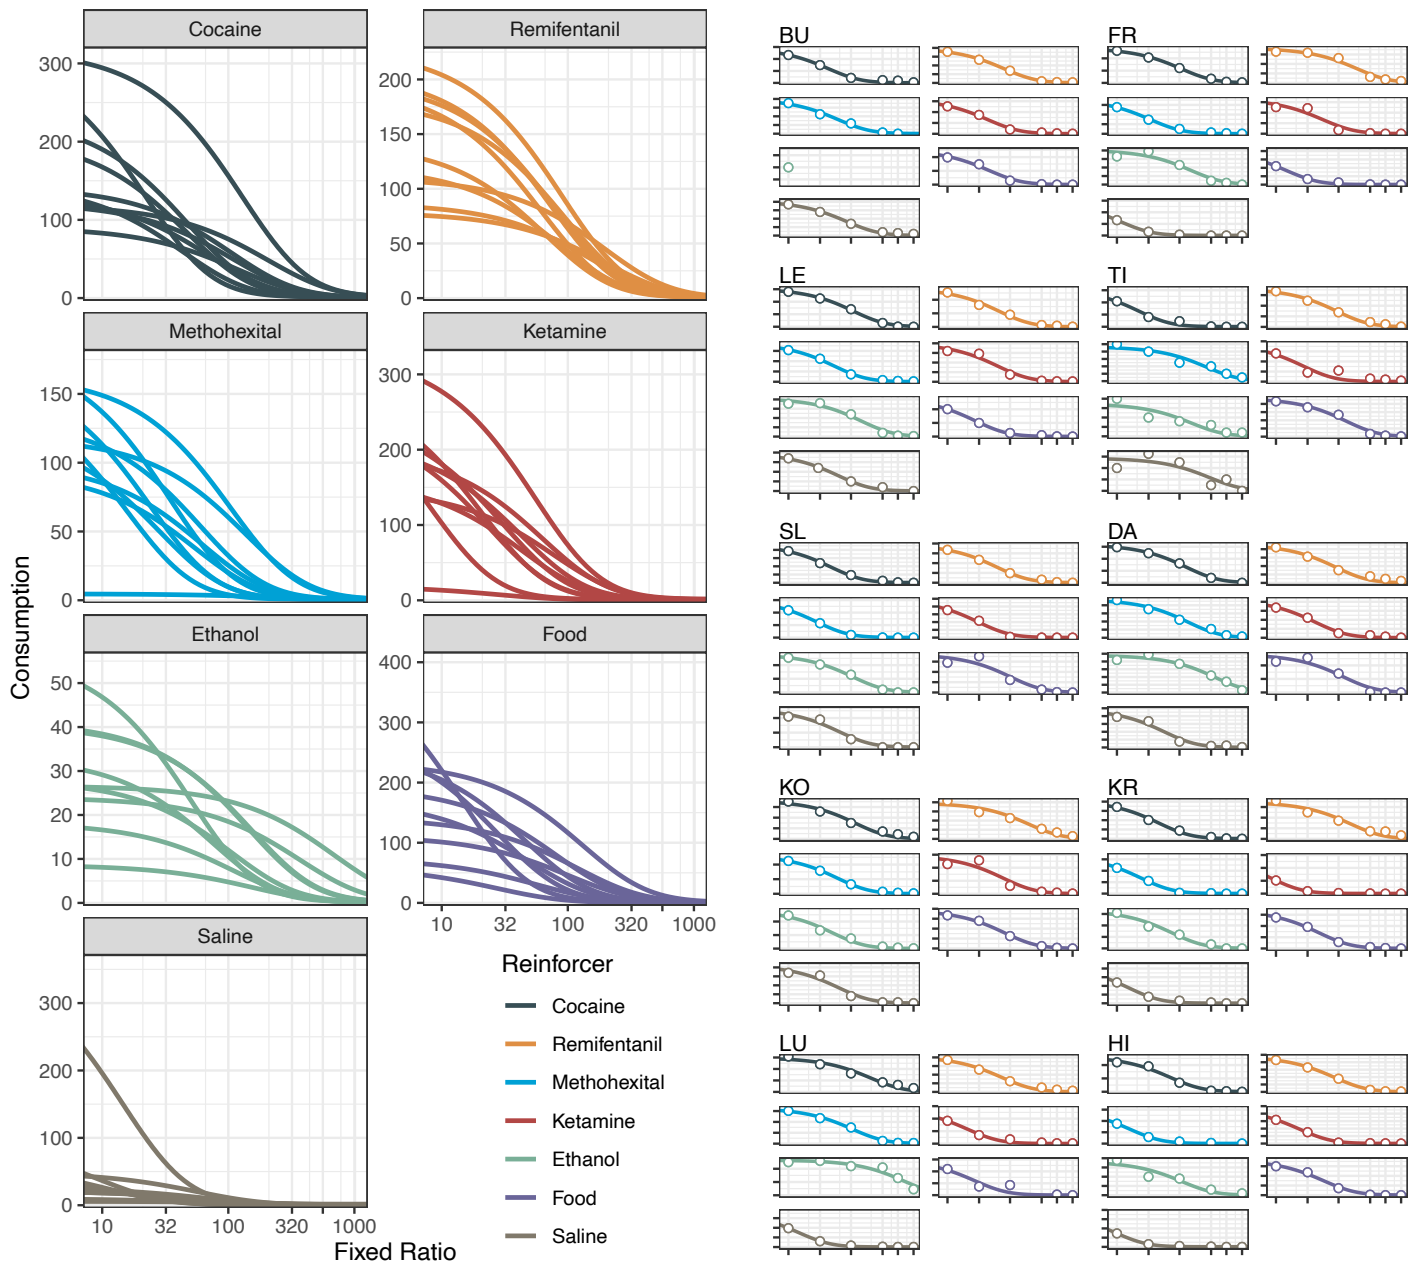

**Figure S3:** Results from the monkey stage one analysis from the two-stage approach. Original data from Koffarnus et al. (2012). *Left panel:* Individual predicted curves for each monkey and each reinforcer. *Right panel:* Nonhuman points and the observed consumption. The predicted lines are fit to each monkey and each reinforcer. Note that the following monkeys and reinforcers were not fit: BU (Ethanol).

MIXED-MODEL DEMAND

**Table S1:** Posthoc pairwise comparisons (*t*-tests) of  $\log(\alpha)$  resulting from the mixed-effects model.

| Contrast                    | Estimate (difference) | SE     | d.f. | t-value | p-value       |
|-----------------------------|-----------------------|--------|------|---------|---------------|
| Cocaine - Ethanol           | -0.3715               | 0.1109 | 386  | -3.3517 | <b>0.0018</b> |
| Cocaine - Food              | -0.0911               | 0.1008 | 386  | -0.9036 | 0.4054        |
| Cocaine - Ketamine          | -0.2189               | 0.0960 | 386  | -2.2793 | <b>0.0375</b> |
| Cocaine - Methohexital      | -0.3026               | 0.0908 | 386  | -3.3337 | <b>0.0018</b> |
| Cocaine - Remifentanyl      | 0.0614                | 0.0660 | 386  | 0.9308  | 0.4054        |
| Cocaine - Saline            | -0.8880               | 0.1370 | 386  | -6.4794 | <b>0.0000</b> |
| Ethanol - Food              | 0.2804                | 0.1215 | 386  | 2.3086  | <b>0.0375</b> |
| Ethanol - Ketamine          | 0.1527                | 0.1174 | 386  | 1.3006  | 0.2549        |
| Ethanol - Methohexital      | 0.0690                | 0.1131 | 386  | 0.6101  | 0.5422        |
| Ethanol - Remifentanyl      | 0.4329                | 0.0950 | 386  | 4.5591  | <b>0.0000</b> |
| Ethanol - Saline            | -0.5164               | 0.1530 | 386  | -3.3759 | <b>0.0018</b> |
| Food - Ketamine             | -0.1277               | 0.1082 | 386  | -1.1806 | 0.2946        |
| Food - Methohexital         | -0.2114               | 0.1036 | 386  | -2.0416 | 0.0628        |
| Food - Remifentanyl         | 0.1525                | 0.0828 | 386  | 1.8425  | 0.0926        |
| Food - Saline               | -0.7968               | 0.1460 | 386  | -5.4591 | <b>0.0000</b> |
| Ketamine - Methohexital     | -0.0837               | 0.0987 | 386  | -0.8483 | 0.4166        |
| Ketamine - Remifentanyl     | 0.2803                | 0.0768 | 386  | 3.6476  | <b>0.0008</b> |
| Ketamine - Saline           | -0.6691               | 0.1424 | 386  | -4.6981 | <b>0.0000</b> |
| Methohexital - Remifentanyl | 0.3639                | 0.0702 | 386  | 5.1865  | <b>0.0000</b> |
| Methohexital - Saline       | -0.5854               | 0.1389 | 386  | -4.2152 | <b>0.0001</b> |
| Remifentanyl - Saline       | -0.9494               | 0.1242 | 386  | -7.6428 | <b>0.0000</b> |

Note: SE = Standard Error; d.f. = Degrees of Freedom. False discovery rate adjustment to p-values.
